# Supplementary material
Source: publisher figshare collection journal article supplement (https://gsajournals.figshare.com/ndownloader/files/26580986)
Supplement: Supplementary file 1 [file 26580986]

**A**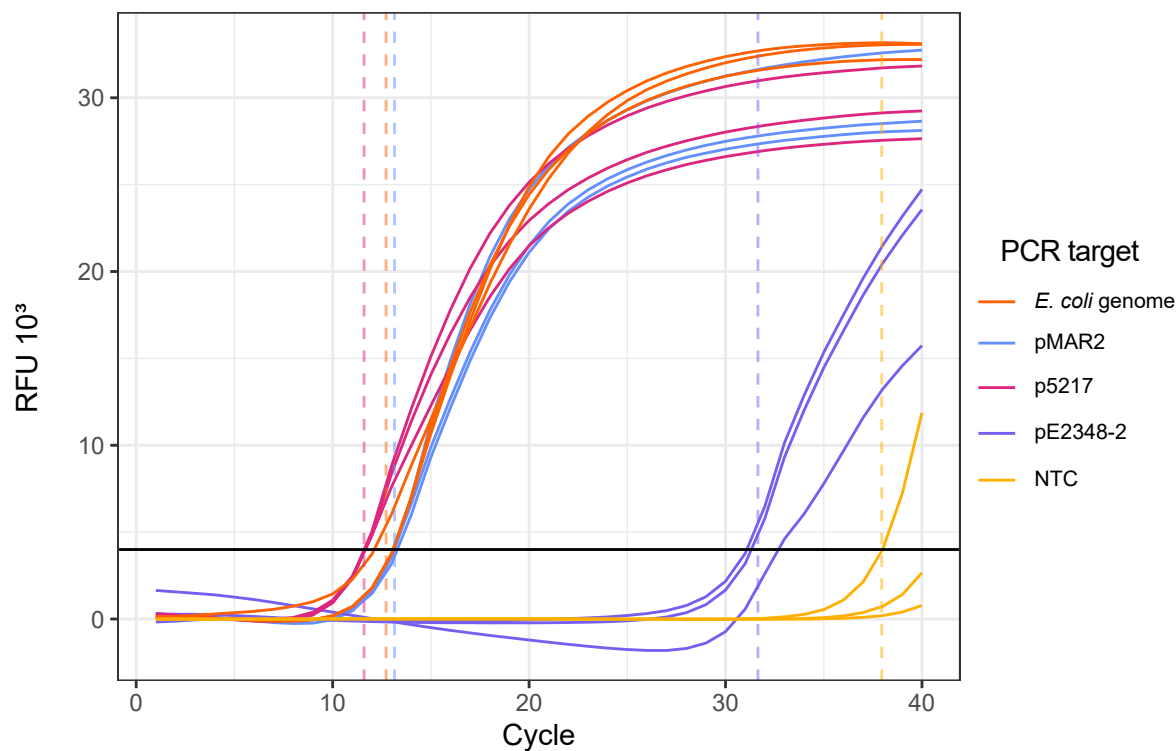**B**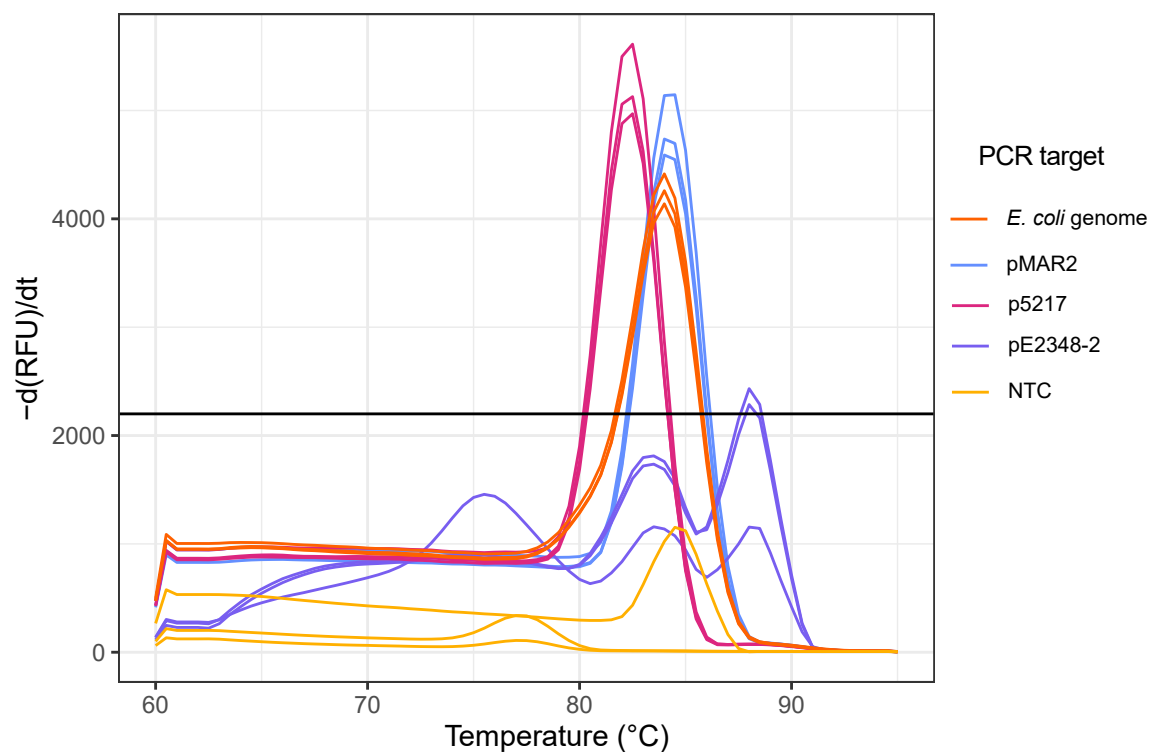

**Figure S4. qPCR amplification of *E. coli* sequences.**

**A.** qPCR amplification of *E. coli* sequences. The horizontal black line represents the threshold set by Bio-Rad CFX384 for calling Ct values (RFU = 4000). Vertical dotted lines represent mean Ct values for each target sequence. **B.** Melt curves from qPCR of *E. coli* genome and plasmids. The horizontal line represents the threshold at which successful amplicons were called by Bio-Rad CFX384 ( $-d(RFU) / dt = 2200$ ). NTC – negative template control.
